# Supplementary material
Source: MDPI journal article supplement (https://www.mdpi.com/2312-7481/9/1/23)
Supplement: s1 [file s1]

## SUPPORTING INFORMATION

Review

# Recent Approaches in Magnetic Nanoparticle-based Biosensors of miRNA Detection

Simge Balaban Hanoglu <sup>1,\*</sup>, Duygu Harmanci <sup>2</sup>, Nursima Ucar <sup>1</sup>, Serap Evran<sup>1</sup> and Suna Timur <sup>1,2,\*</sup>

<sup>1</sup> Department of Biochemistry, Faculty of Science, Ege University, Bornova, Izmir 35100, Turkey

<sup>2</sup> Central Research Test and Analysis Laboratory, Application and Research Center, Ege University, Bornova, Izmir 35100, Turkey

\* Correspondence: simge93balaban@gmail.com (S.B.H.); suna.timur@ege.edu.tr (S.T.)

**Table S1.** Literature survey of the MNP-based biosensor system for miRNA detection.

| Target miRNA | Biosensor Type | Biosensor Design                                                                                                                                                     | LOD      | Lineer Range                        | Sample Type | Ref.  |
|--------------|----------------|----------------------------------------------------------------------------------------------------------------------------------------------------------------------|----------|-------------------------------------|-------------|-------|
| Let-7a       | Colorimetric   | Fe <sub>3</sub> O <sub>4</sub> nanosheet//H1/H2/miRNA/TMB/H <sub>2</sub> O <sub>2</sub>                                                                              | 13 aM    | 0.05 fM-12 nM                       | Serum       | [174] |
| miR-21       | Colorimetric   | Plate/streptavidin/biotinylated universal translator/miR-21/biotinylated H <sub>2</sub> + GMNP-H1-GMNP-H3/DNA concatemers/ Hemin/H <sub>2</sub> O <sub>2</sub> /ABTS | 1 aM     | 1 aM-7.5 pM                         | Serum       | [173] |
| miRNA -155   | Colorimetric   | Au-Fe <sub>3</sub> O <sub>4</sub> /substrate strands/DNAzyme strand/miRNA-155/Mn <sup>2+</sup> /magnetic seperation /AuNP/NaCl                                       | 16.7 fM  | 0.05–1 pM                           | Serum       | [175] |
| miRNA -141   | Fluorescence   | MNPs@PDA/FAM-labeled DNA                                                                                                                                             | 0.42 pM  | 5 pM to 5 nM                        | Cell line   | [176] |
| miR-21       | Fluorescence   | SA-MNPs/biotin-Probe1/Probe2/Probe3/probe 4/miRNA-21 /ssDNA-FQ probe/Cas12a/crRNA                                                                                    | 0.89 fM  | 10 to 1 × 10 <sup>5</sup> fM        | Plasma      | [180] |
| miRNA -141   | Fluorescence   | MNP/Probe1/Probe2/Probe3/ miRNA-141/ Biotin-Probe4/ SA-HRP/Tyramine/H <sub>2</sub> O <sub>2</sub>                                                                    | 10 fM    | 10 <sup>2</sup> -10 <sup>6</sup> fM | Plasma      | [179] |
| miRNA -150   | Fluorescence   | MNP/FAM-labeled- SeqA/ FAM-labeled SeqB/SeqC-BHQ1 /miRNA-150                                                                                                         | 38 fM    | 100 fM to 10 nM                     | Serum       | [177] |
| miRNA -20a   | Fluorescence   | Fe <sub>3</sub> O <sub>4</sub> @C/ H <sub>3</sub> sequence/ H <sub>2</sub> sequence/ H1 sequence/                                                                    | 0.491 pM | 0.450–190 pM                        | Cell lines  | [178] |

|                                        |                          |                                                                                                                                                                                                                |                                                                       |                                                 |                        |       |
|----------------------------------------|--------------------------|----------------------------------------------------------------------------------------------------------------------------------------------------------------------------------------------------------------|-----------------------------------------------------------------------|-------------------------------------------------|------------------------|-------|
|                                        |                          | miRNA/FAM-labelled FH3N sequence                                                                                                                                                                               |                                                                       |                                                 |                        |       |
| miRNA-210                              | Electrochemiluminescence | MGCE/Fe <sub>3</sub> O <sub>4</sub> NP@SiO <sub>2</sub> -cholesterol-attached hairpin aptamer/TNBC serum sample/MoS <sub>2</sub> naosheet-DNA probe                                                            | 0.3 fM                                                                | 1 fM to 100 pM                                  | Serum                  | [183] |
| miRNA 155 and miRNA-126                | Electrochemiluminescence | Paper/AuNP S1/MCH/Fe <sub>3</sub> O <sub>4</sub> -S2-H1-H2-CdTeQD/K <sub>2</sub> S <sub>2</sub> O <sub>8</sub> DNA2/MEA/ST-Au@g-C <sub>3</sub> N <sub>4</sub> NS/ K <sub>2</sub> S <sub>2</sub> O <sub>8</sub> | 5.7 fM for miRNA-155 and 4.2 fM for miRNA-126                         | $1.0 \times 10^{-14}$ to $1.0 \times 10^{-7}$ M |                        | [182] |
| miRNA-141                              | Electrochemiluminescence | GCE/Fe <sub>3</sub> O <sub>4</sub> @SiO <sub>2</sub> @Au-cDNA/miRNA-141/[Ru(dcbpy) <sub>3</sub> ]- Zn(NO <sub>3</sub> ) <sub>2</sub> -sDNA                                                                     | 0.3 fM                                                                | 0.001–10 pM                                     | Serum                  | [184] |
| miRNA-122                              | SERS                     | AuAg polyhedral/ S4/ZnO@S1/S2/ target miRNA/ CoFe <sub>2</sub> O <sub>4</sub> @S3/ S5/DNA enzyme/DOX                                                                                                           | 6.82 aM                                                               | 10 aM to 10 pM                                  | Serum                  | [186] |
| miRNA-122<br>miRNA-223<br>miRNA-21     | SERS                     | Serum Sample/Magnetic capture unit (Fe <sub>3</sub> O <sub>4</sub> @Ag-COOH-Capture DNA probes)/SERS-Tag (AuNP-DNA-reporter-Probe DNA)                                                                         | 349 aM for miRNA-122;<br>374 aM for miRNA-223;<br>311 aM for miRNA-21 | 1 fM to 10 nM                                   | Serum                  | [187] |
| miRNA-141                              | SERS                     | SA@GNPs-reporter probe/miRNA-141/Au@MNPs-Capture probe                                                                                                                                                         | 1.8 pM                                                                | 1.8 nM to 1.8 pM                                | Serum                  | [189] |
| miR-141,<br>miR-429<br>and<br>miR-200b | SERS                     | SA@GNPs-reporter probe/miRNA-141/Au@MNPs-Capture probe                                                                                                                                                         | 120 fM                                                                | 0.2 fM to 1 pM.                                 | Serum                  | [188] |
| Let-7b                                 | Optomagnetic             | ST-MPs/Biotinylated-RCA template/MNP/target-miRNA                                                                                                                                                              | 1 fM                                                                  | 10 fM to 1 nM                                   | Cell extract and serum | [192] |
| Let-7b                                 | Optomagnetic             | Streptavidin coated-MNP/substrate sequences/DZb/DZa/Sample                                                                                                                                                     | 6 pM                                                                  | 10 pM and 100 nM                                | Serum                  | [191] |

|                        |                 |                                                                                                                                                                                                                                                         |                                              |                                          |                          |       |
|------------------------|-----------------|---------------------------------------------------------------------------------------------------------------------------------------------------------------------------------------------------------------------------------------------------------|----------------------------------------------|------------------------------------------|--------------------------|-------|
| miRNA 21 and miRNA 155 | Electrochemical | SPCE/Gold Stir-bar/Fe <sub>3</sub> O <sub>4</sub> @Au@electrochemical tag labeled DNAs /complementary DNA chains/ miRNA-21 and miRNA-155                                                                                                                | 1.5 fM for miRNA 21 and 1.8 fM for miRNA 155 | 5 fM – 2nM for miRNA 21 and miRNA 155    | Serum                    | [197] |
| miR-21                 | Electrochemical | Gold microelectrode/Au@MNPs/methylene blue redox-labelled probe DNA/ complemenraty DNA/miRNA-21                                                                                                                                                         | 10 aM                                        | 10 aM to 1 nM                            | Whole blood of nude mice | [198] |
| miRNA -106a            | Electrochemical | GCE/Nafion/Tionine/AF-MNps/LNA/miR-106a/DSN/sDNA/SA-AuNP/biotin-HRP                                                                                                                                                                                     | 0.8 fM                                       | 1 fM to 5 µM                             | Serum                    | [202] |
| miR-21                 | Electrochemical | SPCE/GO-IO hybrid/miRNA-21                                                                                                                                                                                                                              | 1.0 fM                                       | 1.0 fM to 1 nM                           | Cell lines               | [195] |
| miRNA -106a and let-7a | Electrochemical | SPCE/PTh/rGO/streptavidin/ biotin-capture probes/[Fe <sub>3</sub> O <sub>4</sub> /TMC/ Au/streptavidin/ biotin-miRNA-106a signal probe/miRNA-106a] and [Fe <sub>3</sub> O <sub>4</sub> /TMC/CdSe@CdS/streptavidin e/ biotin-let-7a signal probe/let-7a] | 0.02 fM and for let-7a; 0.06 fM for miR-106a |                                          | Plasma                   | [196] |
| miRNA -21              | Electrochemical | GCE/AuNP/H1/H2-Target/Fe <sub>3</sub> O <sub>4</sub> /CeO <sub>2</sub> @Au-S1/MB                                                                                                                                                                        | 0.33 fM                                      | 1 fM to 1 nM                             | Serum                    | [200] |
|                        | Electrochemical | Gold electrode/probe B/[Fe <sub>3</sub> O <sub>4</sub> @Au/Probe A/miRNA/DSN] /Probe C and D/ NEase                                                                                                                                                     | 3 × 10 <sup>-18</sup> M                      | 10 <sup>-17</sup> to 10 <sup>-14</sup> M |                          | [199] |
| miRNA -21              | Electrochemical | GCE/rGO/β-CD/MB/[Fe <sub>3</sub> O <sub>4</sub> /DNA/2Fc-DNA/A-1/A-2/miRNA-21]                                                                                                                                                                          | 1.8 fM                                       | 10 fM–0.1 nM                             | Serum                    | [201] |

TMB: 3,3',5,5'-tetramethylbenzidine; GMNP: gold decorated magnetic nanoparticle; ABTS: 2, 2'-azino-bis (3-ethylbenzothiazoline-6-sulfonic acid); PDA: poly- dopamine, FAM: 6-carboxy fluorescence; SA-HRP: streptavidin- horseradish peroxidase; SA-MNPs: Streptavidin-modified MNPs; SeqA: free chain; SeqB: fixed chain; SeqC: auxiliary chain; pDNA:probe DNA; CDs: carbon dots; MGCE: magnetic glassy carbon electrodes; TNBC: triple-negative breast cancer; MCH: 6-Mercapto-1-hexanol (MCH); MEA: monoethanolamine; AuNP: gold nanoparticle; DOX: Raman-probe; SA@GNP: silica-coated Raman-scatter tagged gold NP; ST-MPs: streptavidin-coated magnetic particle; RCA: rolling circle amplification; SPCE: screen printed carbon electrode; LNA: hairpin locked nucleic acid probes; DSN: duplex-specific nuclease; biotin-HRP: biotin-labeled horseradish peroxidase; AF-MNps: aldehyde-functionalized MNps (Fe<sub>3</sub>O<sub>4</sub> nanoparticle); GO-IO hybrid: graphene oxide-loaded iron oxide; PTh: Polythiophene; rGO: reduced graphene oxide; TMC: trimethylchitosan; GCE: glassy carbon electrode; MB:methylene blue; β-CD: β-cyclodextrin; 2Fc-DNA: double ferrocene-labeled hairpin DNA
